# Supplementary material for: Exploring the Impact of Solid-State Fermentation on Macronutrient Profile and Digestibility in Chia (Salvia hispanica) and Sesame (Sesamum Indicum) Seeds
Source: MDPI journal article supplement (doi:10.3390/foods11030410), 2022-01-30
Supplement: s1 [file s1]

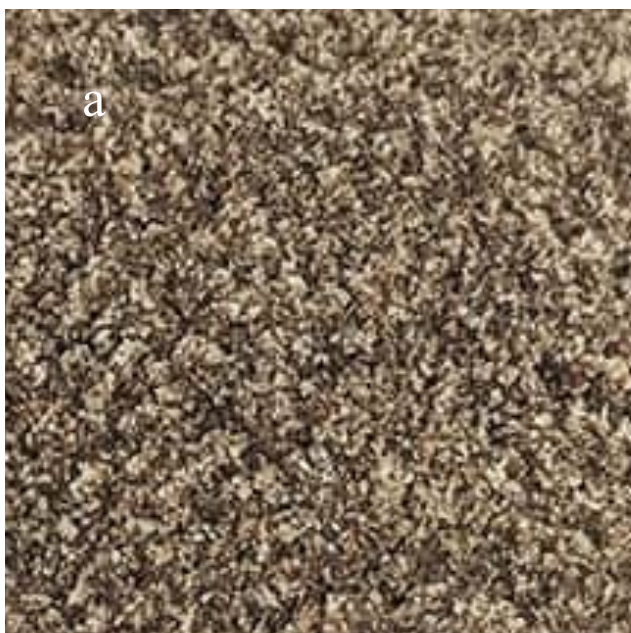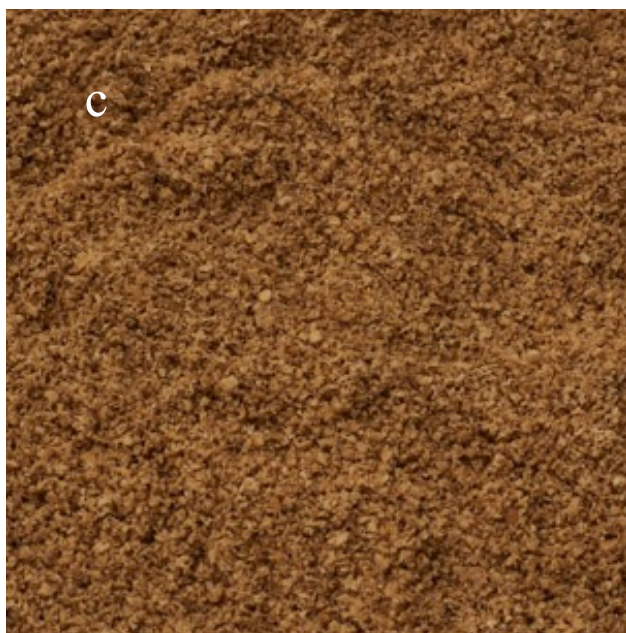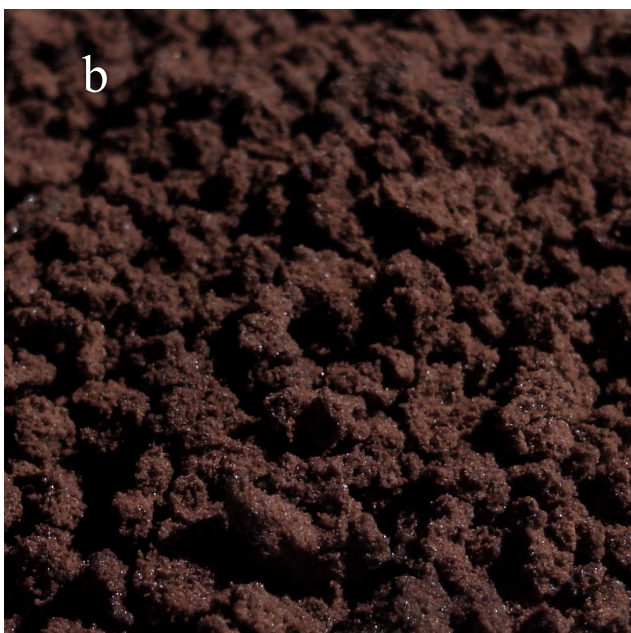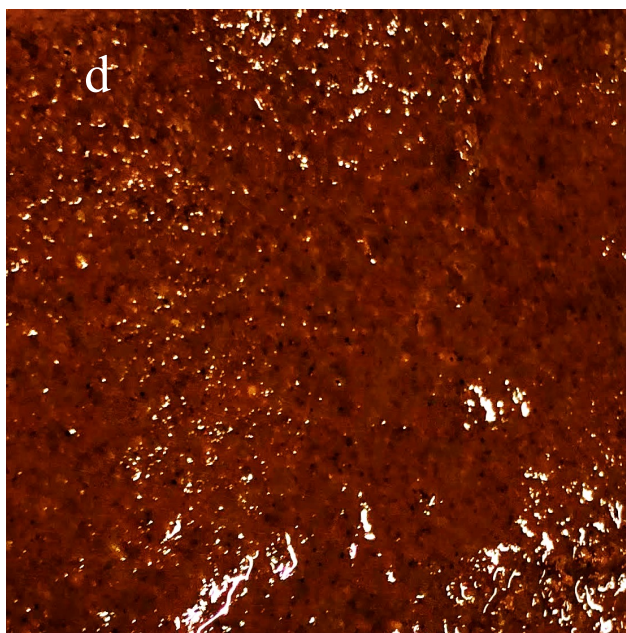

Figure S1. Visual appearance of the obtained products: (a) control chia; (b) fermented chia; (c) control sesame; (d) fermented sesame
